# Supplementary material
Source: PubMed Central journal article supplement (PMC3321233)
Supplement: 97320630008251S1.pdf [file 97320630008251S1.pdf]

## Supplementary Material:

**Table 1:** The ligands were taken from the plant *Momordica charantia*. The molecular weights are calculated and given in column 4. The ligands that show passing Lipinski's filter based on colors in column 5 and bioavailability in column 6.

| Sl.no. | Compound Name | IUPAC Name                                                                                                                                                          | Molecular Weight | Lipinki's Filter | Bioavailability |
|--------|---------------|---------------------------------------------------------------------------------------------------------------------------------------------------------------------|------------------|------------------|-----------------|
| 1      | Charantin     | (2S, 3R, 4R, 6R)-5-(10.13-dimethyl-17-(6-methylheptan-2-yl)-hexadecahydro-1H-cyclopenta[a]phenathren-3-yloxy)-6-(hydroxymethyl)-tetrahydro-2H-pyran-2,3,4,5-tetraol | 574.83           | Blue             | Red (Six)       |
| 2      | Momordenol    | 17-(5-ethyl-6-methylheptan-2-yl)-3-hydroxy-9, 13-dimethyl-1,3,4,7,8,10,11,13,17-decahydro-2H-cyclopenta[a]-16(9H)-one                                               | 426.35           | Blue             | Red (Six)       |
| 3      | Momordicilin  | (E)-4-((2-hydroxyhex-3-en-2-yloxy)methyl)-4,6a,6b,8a,11,12,14b-heptamethyl-octadecahydricen-3(4H,6bH,14bH)-one                                                      | 540.86           | Yellow           | Red (Five)      |

**Table 2:** The active site of the receptor (1Q5K), the grid values taken for docking study and the minimum binding energy of the ligands.

| Active Site | Residues      | Center of Grid Value    | Minimum Binding Energy (kcal/mol) of the Selected Compounds |            |              |
|-------------|---------------|-------------------------|-------------------------------------------------------------|------------|--------------|
|             |               |                         | Charantin,                                                  | Momordenol | Momordicilin |
| H1          | IGNGGVVKQNC   | 20.411, 27.175, 11.723  | -2.67                                                       | -3.92      | -4.81        |
| H2          | LDPVDPPALHAR  | 29.722, 30.136, -17.358 | -2.95                                                       | -3.92      | -3.64        |
| H3          | QPIFEKVHKVF   | 38.201, 49.261, 12.182  | -3.05                                                       | -3.56      | -5.48        |
| H4          | LHTSSIVRLTPP  | 15.615, 47.909, -1.702  | -2.50                                                       | Nil        | Nil          |
| H5          | VLGQWCSRLEY   | 29.722, 57.083, 3.762   | -2.57                                                       | -3.31      | -4.22        |
| H6          | FKLQKNRELFGS  | 8.603, 31.714, 13.371   | -2.75                                                       | -3.50      | -4.72        |
| H7          | VYRARHSRYGQPE | 34.920, 34.918, 12.531  | -4.25                                                       | -4.06      | -4.08        |
| H8          | PIFGGVEF      | 20.499, 54.988, 20.671  | -2.42                                                       | -4.06      | -4.08        |
